# Supplementary material for: The Esg Gene Is Involved in Nicotine Sensitivity in Drosophila melanogaster
Source: PubMed Central journal article supplement (PMC4519288; doi:10.1371/journal.pone.0133956), 2015-07-29
Supplement: pone.0133956.s005.pdf [file pone.0133956.s005.pdf]

## Custom Antibody Product Report

**Order Number:** 082813AB0401

**P.O. Number:** CVMT13-6045

### **Customer Information**

PATRICIA MORANWHITE  
ConsuLAB-BQ SOS  
451 Tecate Road, Suite #15,  
Tecate, CA 91980  
Phone: +(619) 478 5577  
Fax: +(619) 566 2222  
Email: info@consulab-bqsos.com  
vnarvaezgm@gmail.com

**Number of antibodies included in this package: 1**

**Number of antibodies have not been delivered: 0**

*All reagents are shipped as lyophilized powder. For research use only.*

All claim should be made within 30 days of the products received at the destination in writing form (fax or email) and failure to do so shall constitute a waiver by customer for any and all such claims.

**Antibody:** gi|17136258|ref|NP\_476600.1|escargot [Drosophilamelanogaster]**Antigen Sequence:**

1. YQFEAPQNHSNTP-C
2. DEHIEEDEDVDV-C
3. C-PNASAKKDKNQPP

**Delivery List:**

| Antibody | List of tubes | Description                                | Rabbit # | Original serum vol. | Titer (ELISA) | Purification | IgG (mg/ml) |
|----------|---------------|--------------------------------------------|----------|---------------------|---------------|--------------|-------------|
| 1        |               | peptide, 2.3 mg, 74.25%<br>YQFEAPQNHSNTP-C |          |                     |               |              |             |
|          | 1             | Pre-immune sera                            | 1        | 2 ml                |               |              |             |
|          | 2             | Anti-serum                                 |          | 25 ml               | >1:384,000    | SAS          | 2mg/ml      |
|          | 3             | Anti-serum                                 |          | 25 ml               | >1:384,000    | SAS          | 2mg/ml      |
|          | 4             | Pre-immune sera                            | 2        | 2 ml                |               |              |             |
|          | 5             | Anti-serum                                 |          | 25 ml               | >1:384,000    | SAS          | 2mg/ml      |
|          | 6             | Anti-serum                                 |          | 25 ml               | >1:384,000    | SAS          | 2mg/ml      |
| 2        |               | peptide, 2.3 mg, 74.18%<br>DEHIEEDEDVDV-C  |          |                     |               |              |             |
|          | 1             | Pre-immune sera                            | 1        | 2 ml                |               |              |             |
|          | 2             | Anti-serum                                 |          | 25 ml               | >1:384,000    | SAS          | 2mg/ml      |
|          | 3             | Anti-serum                                 |          | 25 ml               | >1:384,000    | SAS          | 2mg/ml      |
|          | 4             | Pre-immune sera                            | 2        | 2 ml                |               |              |             |
|          | 5             | Anti-serum                                 |          | 25 ml               | >1:384,000    | SAS          | 2mg/ml      |
|          | 6             | Anti-serum                                 |          | 25 ml               | >1:384,000    | SAS          | 2mg/ml      |
| 3        |               | peptide, 2.3 mg, 93.26%<br>C-PNASAKKDKNQPP |          |                     |               |              |             |
|          | 1             | Pre-immune sera                            | 1        | 2 ml                |               |              |             |
|          | 2             | Anti-serum                                 |          | 25 ml               | >1:384,000    | SAS          | 2mg/ml      |
|          | 3             | Anti-serum                                 |          | 25 ml               | >1:384,000    | SAS          | 2mg/ml      |
|          | 4             | Pre-immune sera                            | 2        | 2 ml                |               |              |             |
|          | 5             | Anti-serum                                 |          | 25 ml               | >1:384,000    | SAS          | 2mg/ml      |
|          | 6             | Anti-serum                                 |          | 25 ml               | >1:384,000    | SAS          | 2mg/ml      |

**Formulation:** Lyophilized powder.

### **SAS Purification Procedure**

- 1 Ammonium sulfate precipitation (50% saturation)
- 2 Dialysis dialysis buffer: 0.5 x PBS (pH 7.4)
- 3 freeze drying
- 4 Add Pure H<sub>2</sub>O to the original volume to dissolve the powders.

**Determination of antibody concentration:** BCA protein assays (PIERCE 23227)

**Storage:** Antibody stock solutions (e.g., 1-5 mg/ml) often may be stored at 4 °C for days to weeks without significant loss in activity. For increased stability, glycerol or ethylene glycol may be added to a final concentration of 50% and the antibody stored at -20 °C. Alternatively, the antibody solution may be stored in small working aliquots at -20 °C to avoid repeated freeze-thaw cycles.

### **Reconstitution of Sample**

Marker: Pierce, PageRuler Prestained Protein Ladder

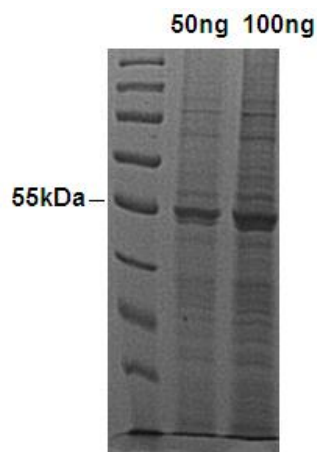

## Result of Western Blot

### Pre-immune sera

Diluent fold of primary antibody: **1:2000**

Diluent fold of secondary antibody: **1:5000**

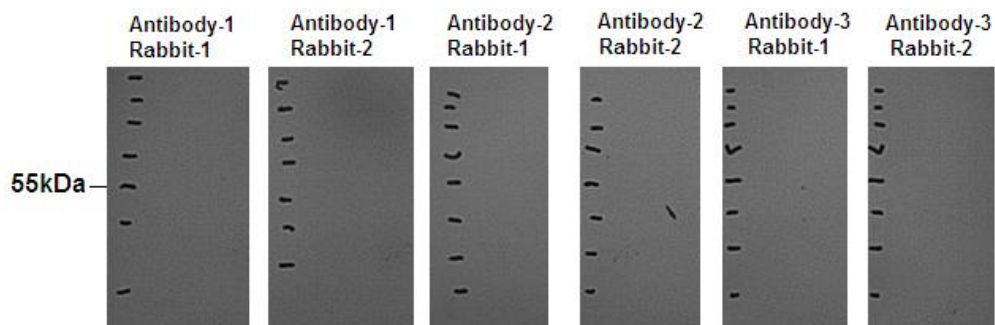

### Anti-serum

Diluent fold of primary antibody: **1:2000**

Diluent fold of secondary antibody: **1:5000**

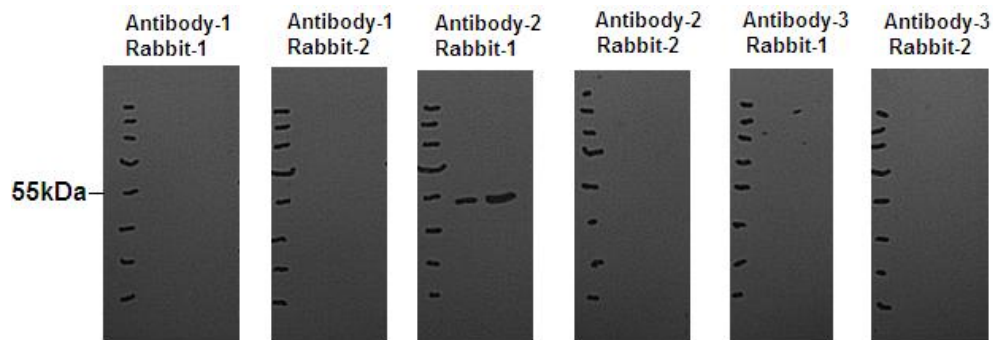

Diluent fold of primary antibody: **1:1000**

Diluent fold of secondary antibody: **1:5000**

EZBiolab Custom Antibody Product Report for 082813AB0401

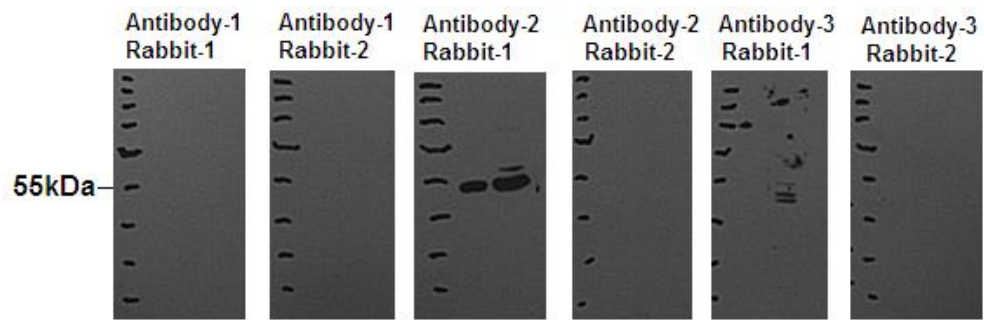

Recommend use of antibody: **1:2000**
